# Supplementary material
Source: PubMed Central journal article supplement (PMC8510633)

# THE LANCET

## Respiratory Medicine

### Supplementary appendix

This appendix formed part of the original submission and has been peer reviewed. We post it as supplied by the authors.

Supplement to: Bos LDJ, Sjoding M, Sinha P, et al. Longitudinal respiratory subphenotypes in patients with COVID-19-related acute respiratory distress syndrome: results from three observational cohort studies. *Lancet Respir Med* 2021; published online Oct 12. [https://doi.org/10.1016/S2213-2600\(21\)00365-9](https://doi.org/10.1016/S2213-2600(21)00365-9).

Online supplement

**Longitudinal respiratory subphenotypes in patients with COVID-19 related acute respiratory distress syndrome**

Lieuwe D.J. Bos PhD [1], Michael Sjoding MD [2], Pratik Sinha MD [3], Sivasubramaniam V Bhavani MD [4], Patrick Lyons MD [3], Michela Botta MD [1], A.M. Tsonas MD [1], Ary Serpa Neto PhD [5-7], Marcus J. Schultz PhD [1,8-9], Robert Dickson MD [2], Frederique Paulus PhD [1]

*For the PROVENT-COVID collaborative group*

Investigators: (in alphabetic order): S Ahuja; J.P. van Akkeren; A.G. Algera; C.K. Algoe; R.B. van Amstel; Artigas A; O.L. Baur; P. van de Berg; A.E. van den Berg; D.C.J.J. Bergmans; D.I. van den Bersselaar; F.A. Bertens; A.J.G.H. Bindels; M.M. de Boer; S. den Boer; L.S. Boers; M. Bogerd; L.D.J. Bos; M. Botta; J.S. Breeel; H. de Bruin; S. de Bruin; C.L. Bruna; L.A. Buiteman–Kruizinga; O.L. Cremer; R.M. Determann; W. Dieperink; D.A. Dongelmans; H.S. Franke; M.S. Galek–Aldridge; M.J. de Graaff; L.A. Hagens; J.J. Haringman; S.T. van der Heide; P.L.J. van der Heiden; N.F.L. Heijnen; S.J.P. Hiel; L.L. Hoeijmakers; L. Hol; M. W. Hollmann; M.E. Hoogendoorn; J. Horn; R. van der Horst; E.L.K. Ie; D. Ivanov; N.P. Juffermans; E. Kho; E.S. de Klerk; A.W.M.M Koopman-van Gemert; M. Koopmans; S. Kucukcelebi; M.A. Kuiper; D.W. de Lange; I. Martin-Loeches; G. Mazzinari; D.M.P. van Meenen; N. van Mourik; L. Morales-Quinteros; S.G. Nijbroek; M. Onrust; E.A.N. Oostdijk; F. Paulus; C.J. Pennartz; J. Pillay; L. Pisani; I.M. Purmer; T.C.D. Rettig; J.P. Roozeman; M.T.U. Schuijt; M.J. Schultz; A. Serpa Neto; M.E. Sleeswijk; M.R. Smit; P.E. Spronk; W. Stilma; A.C. Strang; A. M. Tsonas; P.R Tuinman; C.M.A. Valk; F.L. Veen-Schra; L.I. Veldhuis; P. van Velzen; W.H. van der Ven; A.P.J. Vlaar; P. van Vliet; P.H.J. van der Voort; L. van Welie; H.J.F.T. Wesselink; H.H. van der Wier-Lubbers; B. van Wijk; T. Winters; W.Y. Wong; A.R.H. van Zanten.

**Online method description.**Code used for latent class analysis:

```
### Normalise variables to mean and SD
```

```
predictors.list.mean<-apply(cluster.matrix.lca, 2, mean)
```

```
predictors.list.sd<-apply(cluster.matrix.lca, 2, sd)
```

```
cluster.matrix.lca.normalised<-cluster.matrix.lca
```

```
for(j in list.predictor.variables[1:length(list.predictor.variables)]){
```

```
  cluster.matrix.lca.normalised[j]<-
```

```
  (cluster.matrix.lca[,j]-
```

```
  predictors.list.mean[which(names(predictors.list.mean)==j)]/predictors.list.sd[which(names(predictors.list.sd)
```

```
  ==j)]
```

```
}
```

```
set.seed(999)
```

```
FORMULA <- cbind(driving_pressure,compliance, minute_ventilation,
```

```
  ph,pf_ratio, CO2_difference,
```

```
  VR,mechpower) ~ 1
```

```
CONTROL <- list(tolerance = 10^-12, iter.max = 500)
```

```
cheatMix <- stepFlexmix(FORMULA, k = 1:5,
```

```
  model = FLXMCmvbinary(), data = data.frame(cluster.matrix.lca.normalised),
```

```
  control = CONTROL, nrep = 100)
```

```
cheatMix
```

```
getModel(cheatMix, "BIC")
```

```
plot(cheatMix)
```

Online only tables

**Table S1: Regression coefficients for mixed model analysis of input variables in the derivation cohort .**

| Variable                  | Names                   | Beta estimate | 2.5% CI        | 97.5% CI       |
|---------------------------|-------------------------|---------------|----------------|----------------|
| Pdriving                  | Intercept               | 13.6814       | 13.3904        | 13.9723        |
| Pdriving                  | Hours since admission   | -0.0125       | -0.0153        | -0.0098        |
| <b>Pdriving</b>           | <b>Phenotype 2</b>      | <b>1.0713</b> | <b>0.5684</b>  | <b>1.5742</b>  |
| <b>Pdriving</b>           | <b>Interaction term</b> | <b>0.0084</b> | <b>0.0037</b>  | <b>0.0131</b>  |
| Crs                       | Intercept               | 35.3532       | 34.08          | 36.6267        |
| Crs                       | Hours since admission   | 0.0632        | 0.0497         | 0.0766         |
| Crs                       | Phenotype 2             | 1.1838        | -1.033         | 3.4006         |
| Crs                       | Interaction term        | 0.0078        | -0.0153        | 0.0308         |
| Minute ventilation        | Intercept               | 8.9914        | 8.8504         | 9.1323         |
| Minute ventilation        | Hours since admission   | 0.0098        | 0.0008         | 0.0116         |
| <b>Minute ventilation</b> | <b>Phenotype 2</b>      | <b>1.803</b>  | <b>1.5601</b>  | <b>2.046</b>   |
| <b>Minute ventilation</b> | <b>Interaction term</b> | <b>0.0158</b> | <b>0.0127</b>  | <b>0.019</b>   |
| pH                        | Intercept               | 7.355         | 7.3497         | 7.3603         |
| pH                        | Hours since admission   | 2E-04         | 1E-04          | 2E-04          |
| <b>pH</b>                 | <b>Phenotype 2</b>      | <b>-0.014</b> | <b>-0.0232</b> | <b>-0.0048</b> |
| <b>pH</b>                 | <b>Interaction term</b> | <b>2E-04</b>  | <b>2E-04</b>   | <b>3E-04</b>   |
| PaO2/FiO2                 | Intercept               | 167.8197      | 163.8172       | 171.8218       |
| PaO2/FiO2                 | Hours since admission   | 0.0052        | -0.0378        | 0.0483         |
| PaO2/FiO2                 | Phenotype 2             | 6.4494        | -0.4242        | 13.3232        |
| PaO2/FiO2                 | Interaction term        | 0.0243        | -0.0478        | 0.0964         |
| VR                        | Intercept               | 1.5136        | 1.4683         | 1.5588         |
| VR                        | Hours since admission   | 0.0048        | 0.0044         | 0.0052         |
| <b>VR</b>                 | <b>Phenotype 2</b>      | <b>0.3862</b> | <b>0.3077</b>  | <b>0.4648</b>  |
| <b>VR</b>                 | <b>Interaction term</b> | <b>0.0017</b> | <b>0.0001</b>  | <b>0.0024</b>  |
| Mechanical Power          | Intercept               | 17.1377       | 16.7418        | 17.5334        |
| Mechanical Power          | Hours since admission   | 0.005         | 5E-04          | 0.0096         |
| <b>Mechanical Power</b>   | <b>Phenotype 2</b>      | <b>4.353</b>  | <b>3.6641</b>  | <b>5.0419</b>  |
| <b>Mechanical Power</b>   | <b>Interaction term</b> | <b>0.04</b>   | <b>0.0322</b>  | <b>0.0478</b>  |
| A-etCO2 difference        | Intercept               | 6.2746        | 5.6286         | 6.9206         |
| A-etCO2 difference        | Hours since admission   | 0.0343        | 0.0278         | 0.0407         |
| <b>A-etCO2 difference</b> | <b>Phenotype 2</b>      | <b>2.6403</b> | <b>1.5253</b>  | <b>3.7555</b>  |
| <b>A-etCO2 difference</b> | <b>Interaction term</b> | <b>0.0128</b> | <b>0.0018</b>  | <b>0.0237</b>  |

## Online figures

**Figure S1: Patient recruitment in derivation and replication cohorts**

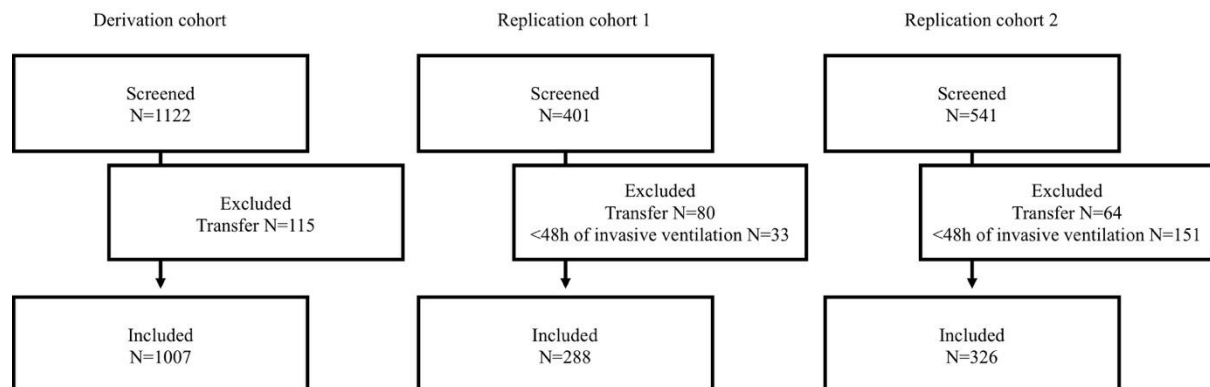

**Figure S2: Model fit for cross-sectional analysis, repeated for data every 24 hours in derivation cohort**

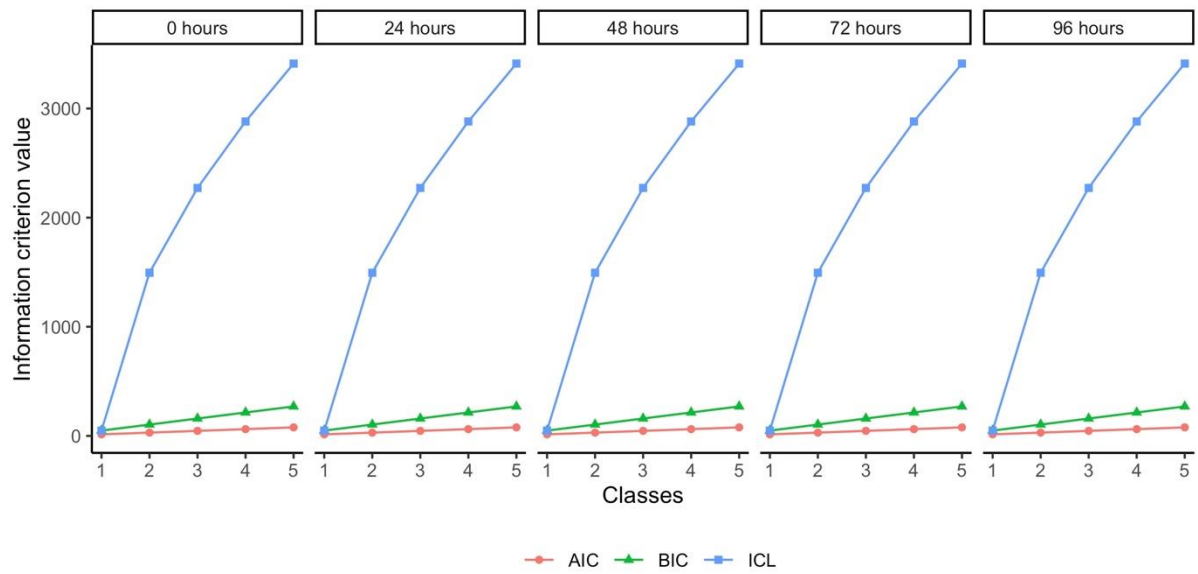

Legend: AIC = Akaike information criterion, BIC = Bayesian information criterion, ICL = Integrated completed likelihood criterion. For AIC, BIC and ICL a lower value indicates a better fit.

Figure S3: Model fit between 1 to 5 classes using longitudinal LCA.

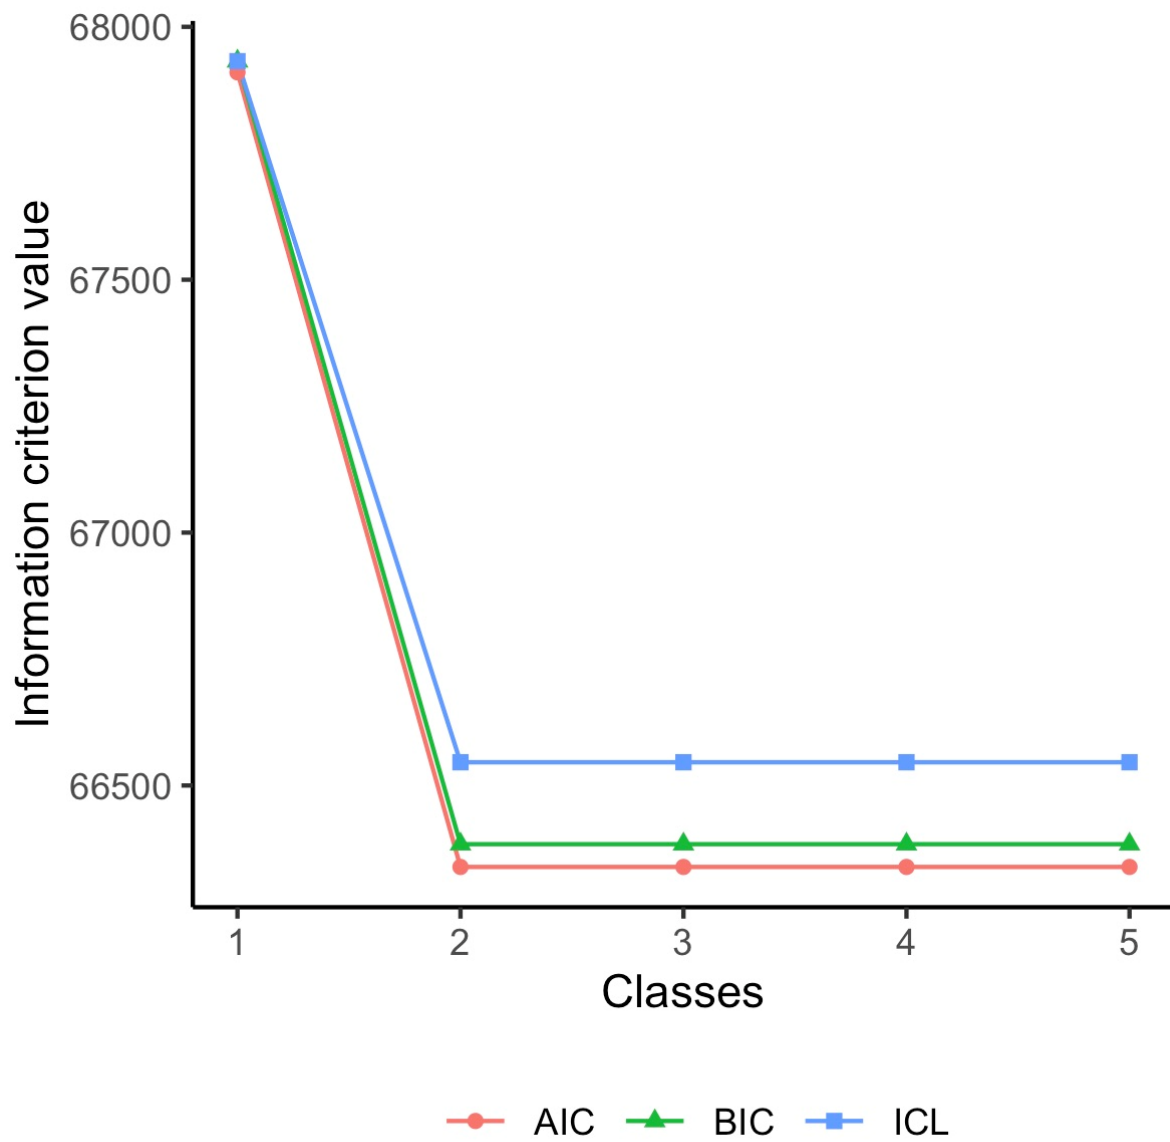

Legend: AIC = Akaike information criterion, BIC = Bayesian information criterion, ICL = Integrated completed likelihood criterion. For AIC, BIC and ICL a lower value indicates a better fit.

Figure S4: Probability of class membership for longitudinal LCA in derivation cohort

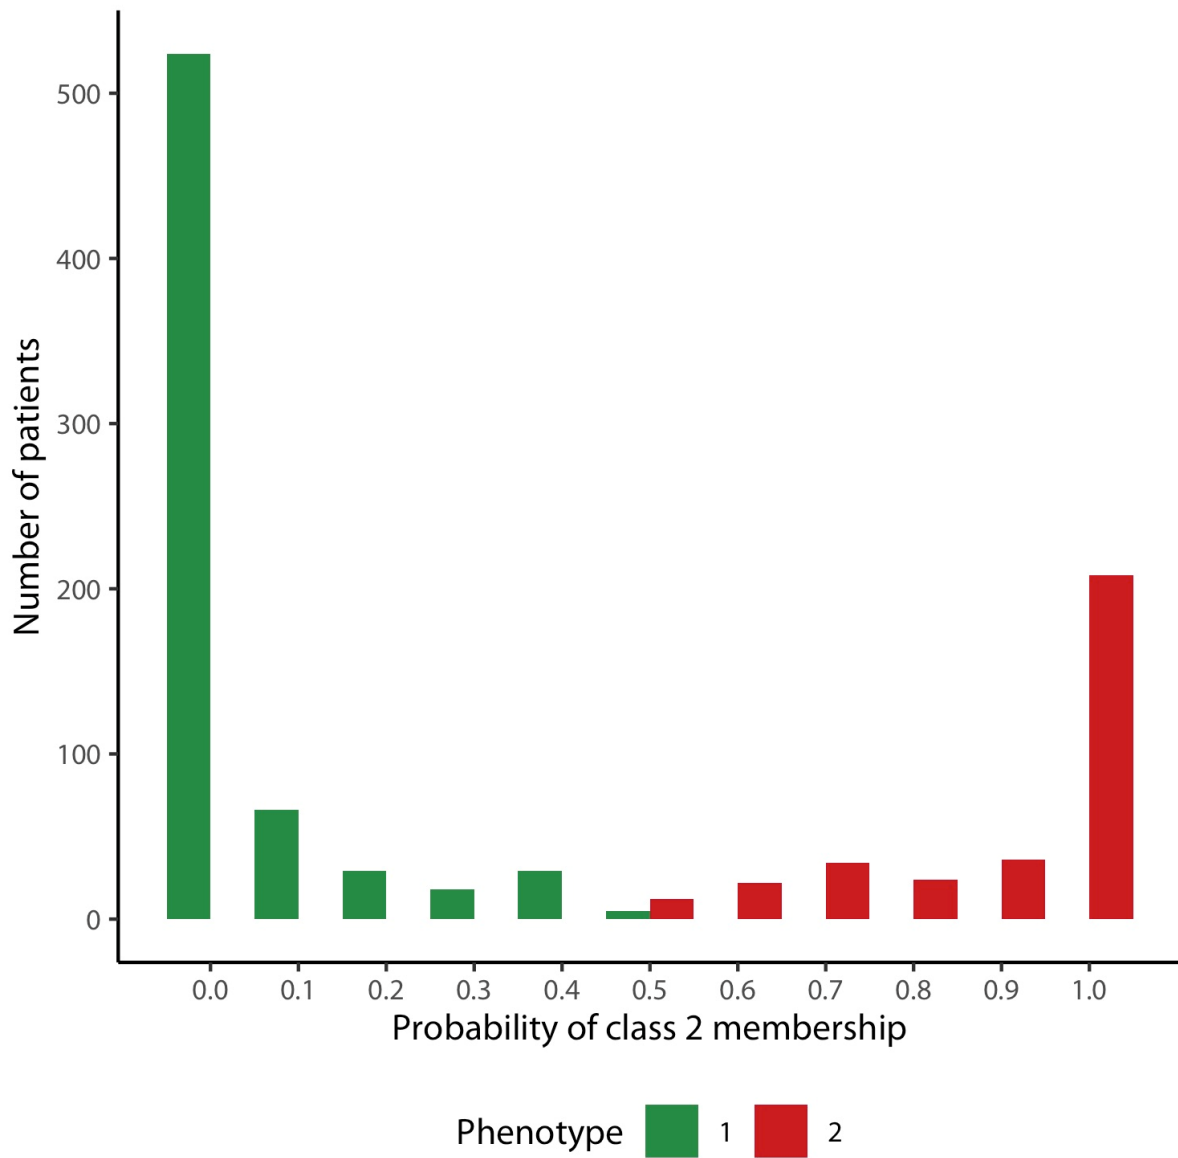

Legend: X-axis shows the probability of phenotype membership binned per 0.1 steps probability. Y-axis shows number of patients per bin.



Figure S5: Model fit between 1 to 5 classes using longitudinal LCA for patients who remained on invasive mechanical ventilation for more than 96 hours

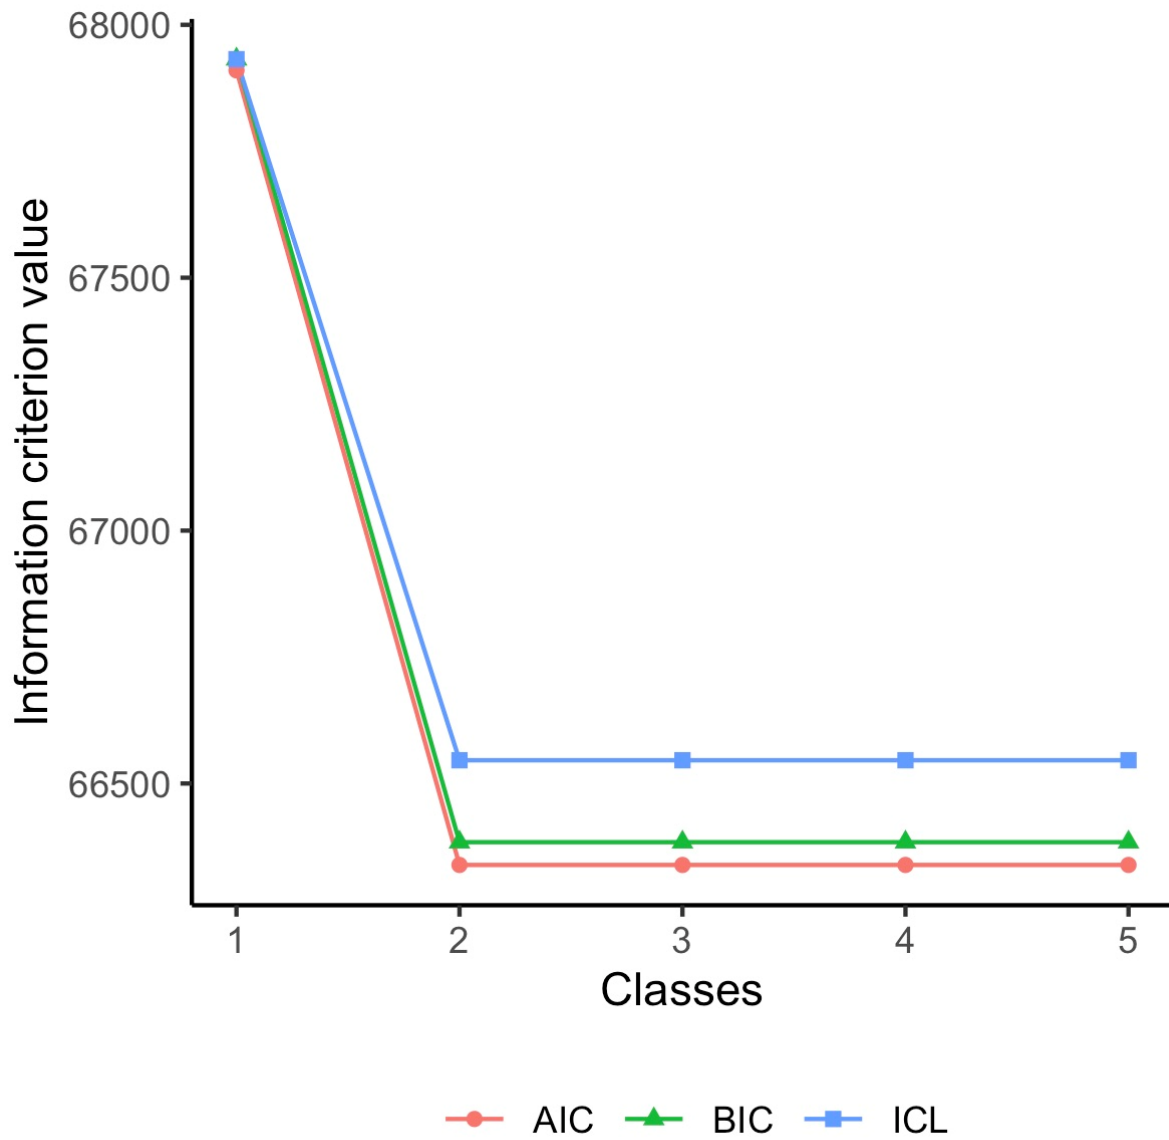

Legend: AIC = Akaike information criterion, BIC = Bayesian information criterion, ICL = Integrated completed likelihood criterion. For AIC, BIC and ICL a lower value indicates a better fit.

**Figure S6: Dynamics of variables that were used to define subphenotypes in the derivation cohort**

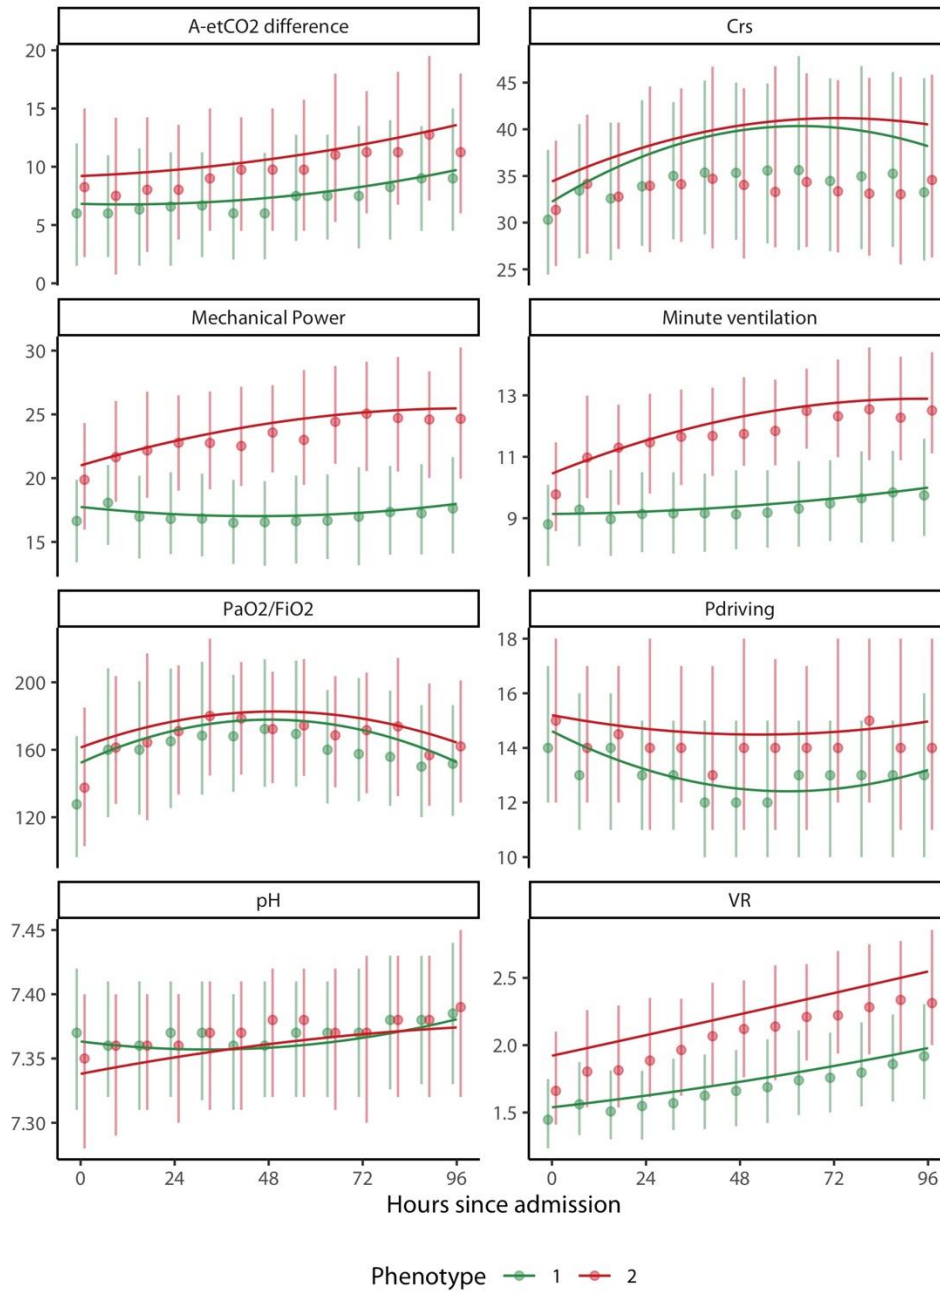

Legend: Y-axis shows the value of the variable and the X-axis the hours since start of mechanical ventilation. Per timepoint the median and inter-quartile range is shown for the two subphenotypes. The green fitted line shows the modelled mean values for subphenotype 1 and the red line for subphenotype 2. The curves are fitted with the formula:  $y \sim poly(x, 2)$ .

**Figure S7: ventilator free days in between time-dependent LCA subphenotypes in original analysis and sensitivity analysis for patients with >96h of MV alone**

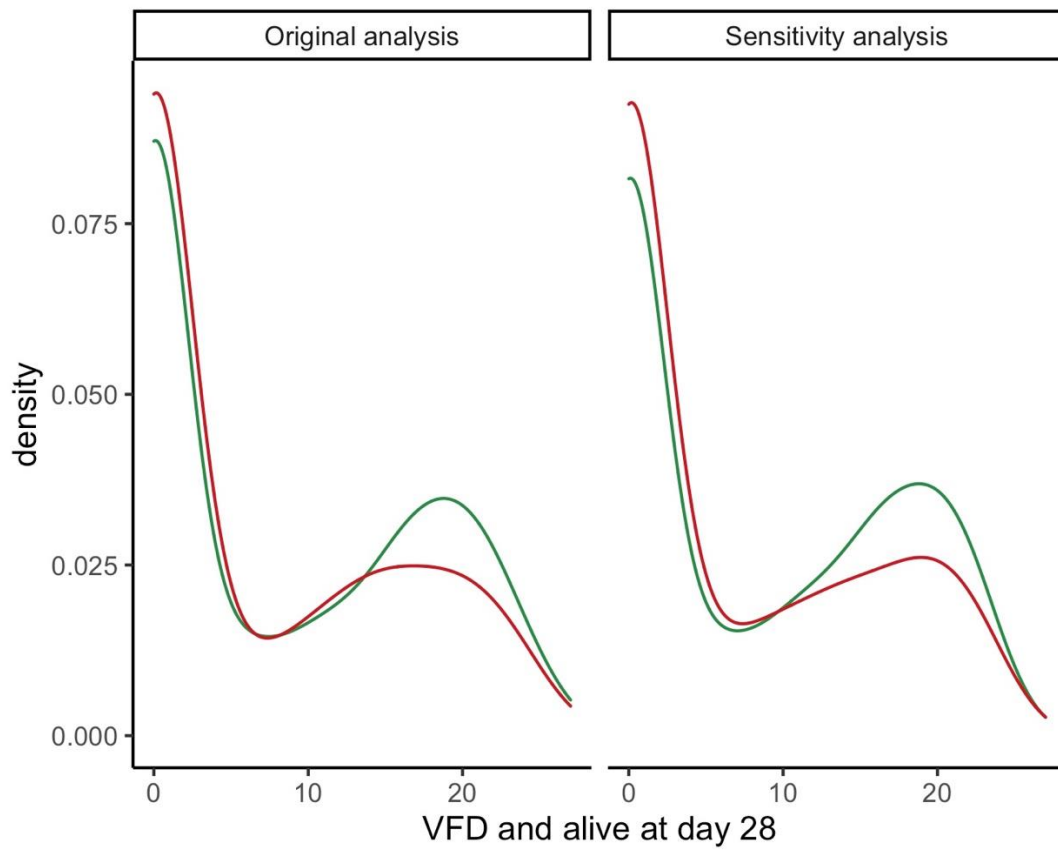

Figure S8: VR trajectories in replication cohort 1

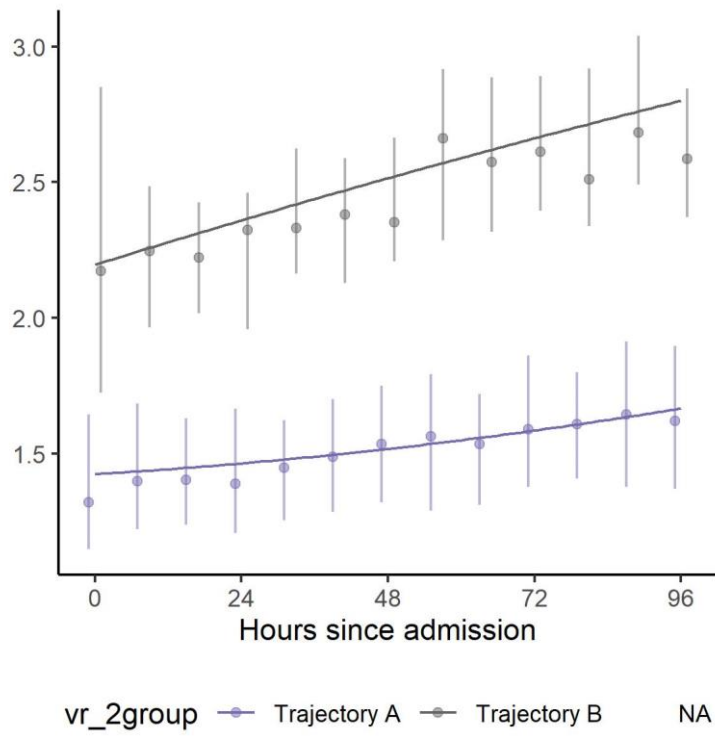

**Figure S9: Mechanical power trajectories in replication cohort 1.**

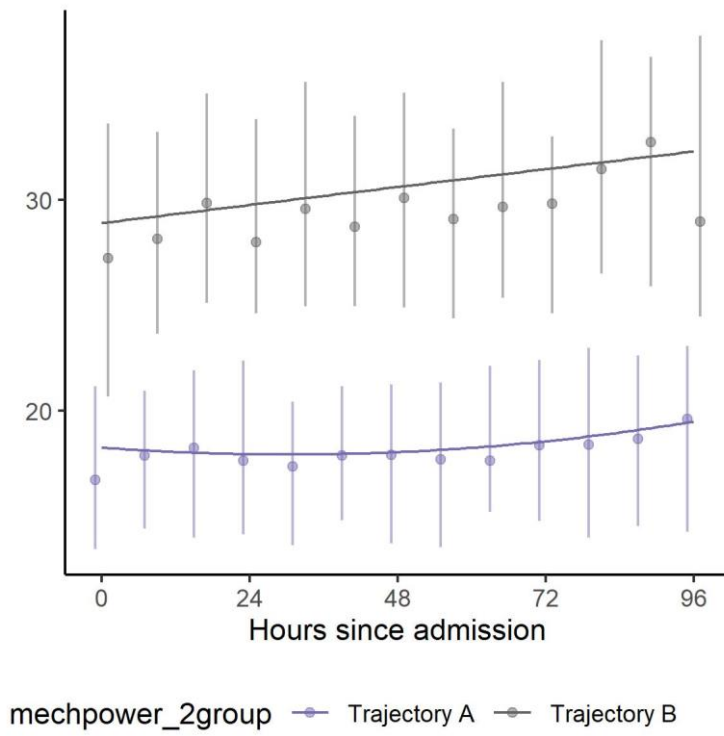

Figure S10: VR trajectories in replication cohort 2

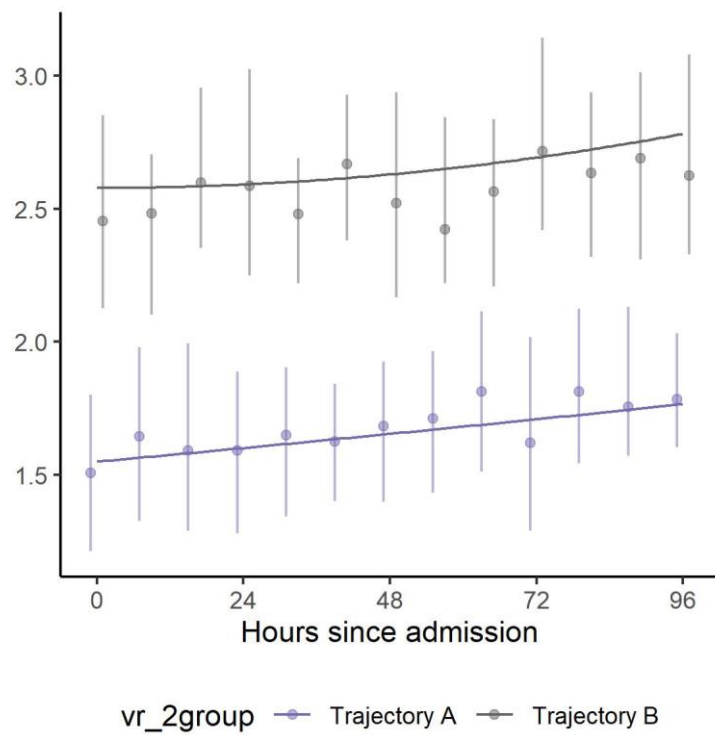

**Figure S11: Mechanical power trajectories in replication cohort 2.**

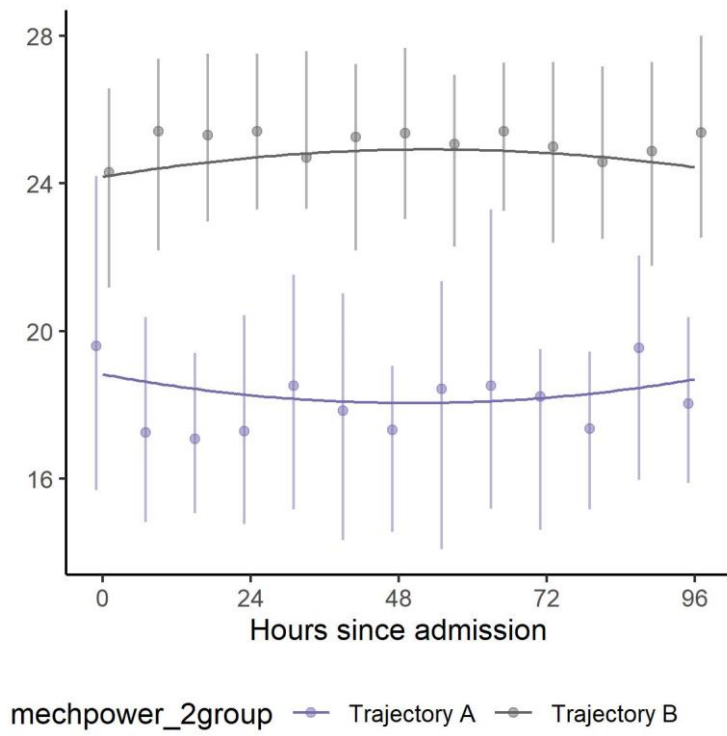

Supplement: mmc1.pdf [file mmc1.pdf]
